# Supplementary material for: Is a Forest Fire a Natural Disaster? Investigating the Fire Tolerance of Various Tree Species—An Educational Module
Source: MDPI journal article supplement (doi:10.3390/biomimetics9020114), 2024-02-15
Supplement: s1 [file s1]

## Total Wildfires and burned Acres in North-America incl. Alaska and Hawaii

The National Interagency Coordination Center at NIFC compiles annual wildland fire statistics for federal and state agencies. This information is provided through Situation Reports, which have been in use for several decades. Prior to 1983, the federal wildland fire agencies did not track official wildfire data using current reporting processes. As a result, there is no official data prior to 1983 posted on this site.

Source: National Interagency Coordination Center

[https://www.nifc.gov/sites/default/files/NICC/2-Predictive%20Services/Intelligence/Annual%20Reports/2022/annual\\_report.2.pdf](https://www.nifc.gov/sites/default/files/NICC/2-Predictive%20Services/Intelligence/Annual%20Reports/2022/annual_report.2.pdf)

| Year | Fires  | km <sup>2</sup> | Acres      |
|------|--------|-----------------|------------|
| 2022 | 68,988 | 30,351          | 7,500,000  |
| 2021 | 58,985 | 28,836          | 7,125,643  |
| 2020 | 58,950 | 40,964          | 10,122,336 |
| 2019 | 50,477 | 18,876          | 4,664,364  |
| 2018 | 58,083 | 35,481          | 8,767,492  |
| 2017 | 71,499 | 40,574          | 10,026,086 |
| 2016 | 67,743 | 22,298          | 5,509,995  |
| 2015 | 68,151 | 40,975          | 10,125,149 |
| 2014 | 63,312 | 14,551          | 3,595,613  |
| 2013 | 47,579 | 17,481          | 4,319,546  |
| 2012 | 67,774 | 37,742          | 9,326,238  |
| 2011 | 74,126 | 35,254          | 8,711,367  |
| 2010 | 71,971 | 13,851          | 3,422,724  |
| 2009 | 78,792 | 23,965          | 5,921,786  |
| 2008 | 78,979 | 21,418          | 5,292,468  |
| 2007 | 85,705 | 37,749          | 9,328,045  |
| 2006 | 96,385 | 39,958          | 9,873,745  |
| 2005 | 66,753 | 35,165          | 8,689,389  |
| 2004 | 65,461 | 32,771          | 8,097,880  |
| 2003 | 63,629 | 16,029          | 3,960,842  |
| 2002 | 73,457 | 29,076          | 7,184,712  |
| 2001 | 84,079 | 14,451          | 3,570,911  |
| 2000 | 92,250 | 29,920          | 7,393,493  |
| 1999 | 92,487 | 22,768          | 5,626,093  |
| 1998 | 81,043 | 5,381           | 1,329,704  |
| 1997 | 66,196 | 11,562          | 2,856,959  |
| 1996 | 96,363 | 24,548          | 6,065,998  |
| 1995 | 82,234 | 7,448           | 1,840,546  |
| 1994 | 79,107 | 16,485          | 4,073,579  |
| 1993 | 58,810 | 7,683           | 1,898,574  |
| 1992 | 87,394 | 8,377           | 2,069,929  |
| 1991 | 75,754 | 11,953          | 2,953,578  |
| 1990 | 66,481 | 18,703          | 4,621,621  |
| 1989 | 48,949 | 7,395           | 1,827,310  |
| 1988 | 72,750 | 20,272          | 5,009,290  |
| 1987 | 71,300 | 9,904           | 2,447,296  |
| 1986 | 85,907 | 11,004          | 2,719,162  |
| 1985 | 82,591 | 11,720          | 2,896,147  |
| 1984 | 20,493 | 4,647           | 1,148,409  |
| 1983 | 18,229 | 5,357           | 1,323,666  |

**human-caused fires**

| <b>Year</b> | <b>Fires</b> | <b>km<sup>2</sup></b> | <b>Acres</b> | <b>% Fires</b> | <b>% km<sup>2</sup></b> |
|-------------|--------------|-----------------------|--------------|----------------|-------------------------|
| 2022        | 61,429       | 13,639                | 3,370,169    | 89             | 45                      |
| 2021        | 52,641       | 12,237                | 3,023,759    | 89             | 42                      |
| 2020        | 53,563       | 24,276                | 5,998,813    | 91             | 59                      |
| 2019        | 44,115       | 4,926                 | 1,217,324    | 87             | 26                      |
| 2018        | 51,576       | 22,826                | 5,640,489    | 89             | 64                      |
| 2017        | 63,546       | 19,548                | 4,830,476    | 89             | 48                      |
| 2016        | 60,932       | 15,243                | 3,766,610    | 90             | 68                      |
| 2015        | 58,916       | 8,144                 | 2,012,461    | 86             | 20                      |
| 2014        | 55,679       | 6,405                 | 1,582,770    | 88             | 44                      |
| 2013        | 38,349       | 5,107                 | 1,261,980    | 81             | 29                      |
| 2012        | 58,331       | 10,118                | 2,500,249    | 86             | 27                      |
| 2011        | 63,877       | 21,678                | 5,356,771    | 86             | 61                      |
| 2010        | 64,807       | 5,275                 | 1,303,449    | 90             | 38                      |
| 2009        | 69,650       | 8,388                 | 2,072,746    | 88             | 35                      |
| 2008        | 70,093       | 13,881                | 3,429,991    | 89             | 65                      |
| 2007        | 73,446       | 15,295                | 3,779,360    | 86             | 41                      |
| 2006        | 80,220       | 17,826                | 4,404,844    | 83             | 45                      |
| 2005        | 58,430       | 6,157                 | 1,521,327    | 88             | 18                      |
| 2004        | 54,101       | 3,904                 | 964,800      | 83             | 12                      |
| 2003        | 50,815       | 7,779                 | 1,922,249    | 80             | 49                      |
| 2002        | 62,022       | 12,453                | 3,077,119    | 84             | 43                      |
| 2001        | 70,066       | 7,077                 | 1,748,661    | 83             | 49                      |

**lightning-caused fires**

| <b>Year</b> | <b>Fires</b> | <b>km<sup>2</sup></b> | <b>Acres</b> | <b>% Fires</b> | <b>% km<sup>2</sup></b> |
|-------------|--------------|-----------------------|--------------|----------------|-------------------------|
| 2022        | 7,467        | 17,025                | 4,206,960    | 11             | 56                      |
| 2021        | 6,344        | 16,600                | 4,101,884    | 11             | 58                      |
| 2020        | 5,387        | 16,687                | 4,123,523    | 9              | 41                      |
| 2019        | 6,362        | 13,950                | 3,447,038    | 13             | 74                      |
| 2018        | 6,507        | 12,655                | 3,127,003    | 11             | 36                      |
| 2017        | 7,953        | 21,026                | 5,195,610    | 11             | 52                      |
| 2016        | 6,790        | 7,055                 | 1,743,385    | 10             | 32                      |
| 2015        | 9,235        | 32,831                | 8,112,688    | 14             | 80                      |
| 2014        | 7,933        | 8,146                 | 2,012,843    | 13             | 56                      |
| 2013        | 9,230        | 12,374                | 3,057,566    | 19             | 71                      |
| 2012        | 9,443        | 27,624                | 6,825,989    | 14             | 73                      |
| 2011        | 10,249       | 13,576                | 3,354,596    | 14             | 39                      |
| 2010        | 7,164        | 8,576                 | 2,119,275    | 10             | 62                      |
| 2009        | 9,142        | 15,577                | 3,849,040    | 12             | 65                      |
| 2008        | 8,856        | 7,537                 | 1,862,477    | 11             | 35                      |
| 2007        | 12,261       | 23,790                | 5,878,691    | 14             | 63                      |
| 2006        | 16,165       | 22,132                | 5,468,901    | 17             | 55                      |
| 2005        | 8,323        | 29,008                | 7,168,062    | 12             | 82                      |
| 2004        | 11,384       | 28,373                | 7,011,023    | 17             | 87                      |
| 2003        | 12,776       | 8,249                 | 2,038,443    | 20             | 51                      |
| 2002        | 11,435       | 16,582                | 4,097,593    | 16             | 57                      |
| 2001        | 14,094       | 7,376                 | 1,822,600    | 17             | 51                      |

**Europa** [https://joint-research-centre.ec.europa.eu/system/files/2022-10/Forest\\_Fires\\_Annual\\_report\\_2021\\_online.pdf](https://joint-research-centre.ec.europa.eu/system/files/2022-10/Forest_Fires_Annual_report_2021_online.pdf)

Annex Table 101 und 102

EUMED 5 = Portugal, Spain, Southern France, Italy, Greece

| Year | Fires<br>(number) | burnt area<br>(ha) | Year | Fires<br>(number) | km <sup>2</sup> | burnt area<br>(ha) |
|------|-------------------|--------------------|------|-------------------|-----------------|--------------------|
| 2022 |                   |                    | 2022 |                   |                 |                    |
| 2021 | 28,944            | 494,082            | 2021 | 28,944            | 4,941           | 494,082            |
| 2020 | 30,661            | 215,126            | 2020 | 30,661            | 2,151           | 215,126            |
| 2019 | 32,158            | 194,710            | 2019 | 32,158            | 1,947           | 194,710            |
| 2018 | 26,434            | 109,808            | 2018 | 26,434            | 1,098           | 109,808            |
| 2017 | 48,140            | 919,913            | 2017 | 48,140            | 9,199           | 919,913            |
| 2016 | 35,801            | 341,760            | 2016 | 35,801            | 3,418           | 341,760            |
| 2015 | 41,963            | 230,167            | 2015 | 41,963            | 2,302           | 230,167            |
| 2014 | 25,746            | 139,005            | 2014 | 25,746            | 1,390           | 139,005            |
| 2013 | 39,776            | 298,733            | 2013 | 39,776            | 2,987           | 298,733            |
| 2012 | 56,593            | 543,181            | 2012 | 56,593            | 5,432           | 543,181            |
| 2011 | 60,280            | 292,181            | 2011 | 60,280            | 2,922           | 292,181            |
| 2010 | 47,632            | 262,545            | 2010 | 47,632            | 2,625           | 262,545            |
| 2009 | 56,799            | 337,953            | 2009 | 56,799            | 3,380           | 337,953            |
| 2008 | 41,389            | 171,746            | 2008 | 41,389            | 1,717           | 171,746            |
| 2007 | 52,058            | 584,571            | 2007 | 52,058            | 5,846           | 584,571            |
| 2006 | 52,263            | 299,622            | 2006 | 52,263            | 2,996           | 299,622            |
| 2005 | 81,374            | 611,562            | 2005 | 81,374            | 6,116           | 611,562            |
| 2004 | 61,176            | 369,717            | 2004 | 61,176            | 3,697           | 369,717            |
| 2003 | 64,875            | 788,522            | 2003 | 64,875            | 7,885           | 788,522            |
| 2002 | 58,761            | 315,277            | 2002 | 58,761            | 3,153           | 315,277            |
| 2001 | 62,440            | 326,007            | 2001 | 62,440            | 3,260           | 326,007            |
| 2000 | 74,006            | 631,950            | 2000 | 74,006            | 6,320           | 631,950            |
| 1999 | 57,092            | 248,142            | 1999 | 57,092            | 2,481           | 248,142            |
| 1998 | 74,793            | 559,748            | 1998 | 74,793            | 5,597           | 559,748            |
| 1997 | 67,707            | 314,222            | 1997 | 67,707            | 3,142           | 314,222            |
| 1996 | 62,399            | 243,379            | 1996 | 62,399            | 2,434           | 243,379            |
| 1995 | 75,322            | 407,319            | 1995 | 75,322            | 4,073           | 407,319            |
| 1994 | 57,215            | 734,195            | 1994 | 57,215            | 7,342           | 734,195            |
| 1993 | 51,942            | 413,726            | 1993 | 51,942            | 4,137           | 413,726            |
| 1992 | 52,134            | 355,983            | 1992 | 52,134            | 3,560           | 355,983            |
| 1991 | 44,569            | 565,840            | 1991 | 44,569            | 5,658           | 565,840            |
| 1990 | 45,338            | 646,822            | 1990 | 45,338            | 6,468           | 646,822            |
| 1989 | 60,423            | 766,020            | 1989 | 60,423            | 7,660           | 766,020            |
| 1988 | 33,701            | 463,775            | 1988 | 33,701            | 4,638           | 463,775            |
| 1987 | 32,665            | 404,051            | 1987 | 32,665            | 4,041           | 404,051            |
| 1986 | 27,439            | 517,203            | 1986 | 27,439            | 5,172           | 517,203            |
| 1985 | 47,034            | 984,188            | 1985 | 47,034            | 9,842           | 984,188            |
| 1984 | 29,997            | 353,958            | 1984 | 29,997            | 3,540           | 353,958            |
| 1983 | 22,913            | 441,931            | 1983 | 22,913            | 4,419           | 441,931            |
| 1982 | 26,081            | 405,432            | 1982 | 26,081            | 4,054           | 405,432            |
| 1981 | 38,443            | 727,064            | 1981 | 38,443            | 7,271           | 727,064            |
| 1980 | 27,749            | 506,328            | 1980 | 27,749            | 5,063           | 506,328            |
